# Supplementary material for: Interplay between strain fitness and transmission frequency determines prevalence of antimicrobial resistance
Source: Frontiers journal article supplement (doi:10.3389/fevo.2023.981377), 2023-03-15
Supplement: Table_1.XLSX [file Table_1.XLSX]

## Sheet: Sheet1
Simulation timescale			Translation to microbiome timescale			Antimicrobial treatment scenarios						Number of hosts treated per day
	e.g. for 100 days of simulation					Scenario 1			Scenario 2			Days = 100, Population = 100 hosts
Treatment interval	Number of treatment events per simulation	Relative frequency of treatment	Number of treatments per year	Treatment interval (days)	Treatment interval (years)	Susceptible's intrinsic growth rate (r_Smax)	Susceptible's mortality rate (d_Smax)	Susceptible's average growth rate (r_Savg)	Susceptible's intrinsic growth rate (r_Smax)	Susceptible's mortality rate (d_Smax)	Susceptible's average growth rate (r_Savg)	estimated % of treated hosts per day
1	100	1	21.4	17	0.05	50	40	10	50	10	40	100
2	50	0.5	10.7	34	0.09	50	40	30	50	20	40	50
3	33.3	0.333	7.13	51	0.14	50	40	36.8	50	30	40	33.3
4	25	0.25	5.35	68	0.19	50	40	40	50	40	40	25
5	20	0.2	4.28	85	0.23	50	40	42	50	50	40	20
6	16.7	0.167	3.57	102	0.28	50	40	43.6	50	63	40	16.7
7	14.3	0.143	3.06	119	0.33	50	40	44.4	50	71	40	14.3
8	12.5	0.125	2.68	136	0.37	50	40	45.2	50	83	40	12.5
9	11.1	0.111	2.38	154	0.42	50	40	45.6	50	91	40	11.1
10	10	0.1	2.14	171	0.47	50	40	46	50	100	40	10
11	9.1	0.091	1.95	188	0.51	50	40	46.4	50	111	40	9.1
12	8.3	0.083	1.78	205	0.56	50	40	46.8	50	125	40	8.3
13	7.7	0.077	1.65	222	0.61	50	40	47.2	50	143	40	7.7
14	7.1	0.071	1.53	239	0.65	50	40	47.2	50	143	40	7.1
15	6.7	0.067	1.43	256	0.7	50	40	47.6	50	167	40	6.7
16	6.3	0.063	1.34	273	0.75	50	40	47.6	50	167	40	6.3
17	5.9	0.059	1.26	290	0.79	50	40	48	50	200	40	5.9
18	5.6	0.056	1.19	307	0.84	50	40	48	50	200	40	5.6
19	5.3	0.053	1.13	324	0.89	50	40	48	50	200	40	5.3
20	5	0.05	1.07	341	0.93	50	40	48	50	200	40	5
21	4.8	0.048	1.02	358	0.98	50	40	48.4	50	250	40	4.8
22	4.5	0.045	0.97	375	1.03	50	40	48.4	50	250	40	4.5
23	4.3	0.043	0.93	392	1.07	50	40	48.4	50	250	40	4.3
24	4.2	0.042	0.89	409	1.12	50	40	48.4	50	250	40	4.2
25	4	0.04	0.86	426	1.17	50	40	48.4	50	250	40	4
26	3.8	0.038	0.82	443	1.21	50	40	48.8	50	333	40	3.8
27	3.7	0.037	0.79	461	1.26	50	40	48.8	50	333	40	3.7
28	3.6	0.036	0.76	478	1.31	50	40	48.8	50	333	40	3.6
29	3.4	0.034	0.74	495	1.36	50	40	48.8	50	333	40	3.4
30	3.3	0.033	0.71	512	1.4	50	40	48.8	50	333	40	3.3
31	3.2	0.032	0.69	529	1.45	50	40	48.8	50	333	40	3.2
32	3.1	0.031	0.67	546	1.5	50	40	48.8	50	333	40	3.1
33	3	0.03	0.65	563	1.54	50	40	48.8	50	333	40	3
34	2.9	0.029	0.63	580	1.59	50	40	49.2	50	500	40	2.9
35	2.9	0.029	0.61	597	1.64	50	40	49.2	50	500	40	2.9
36	2.8	0.028	0.59	614	1.68	50	40	49.2	50	500	40	2.8
37	2.7	0.027	0.58	631	1.73	50	40	49.2	50	500	40	2.7
38	2.6	0.026	0.56	648	1.78	50	40	49.2	50	500	40	2.6
39	2.6	0.026	0.55	665	1.82	50	40	49.2	50	500	40	2.6
40	2.5	0.025	0.54	682	1.87	50	40	49.2	50	500	40	2.5
41	2.4	0.024	0.52	699	1.92	50	40	49.2	50	500	40	2.4
42	2.4	0.023	0.51	716	1.96	50	40	49.2	50	500	40	2.4
43	2.3	0.022	0.5	733	2.01	50	40	49.2	50	500	40	2.3
44	2.3	0.021	0.49	750	2.06	50	40	49.2	50	500	40	2.3
45	2.2	0.02	0.48	768	2.1	50	40	49.2	50	500	40	2.2
46	2.2	0.019	0.47	785	2.15	50	40	49.2	50	500	40	2.2
47	2.1	0.019	0.46	802	2.2	50	40	49.2	50	500	40	2.1
48	2.1	0.018	0.45	819	2.24	50	40	49.2	50	500	40	2.1
49	2	0.017	0.44	836	2.29	50	40	49.2	50	500	40	2
50	2	0.017	0.43	853	2.34	50	40	49.2	50	500	40	2
51	2	0.016	0.42	870	2.38	50	40	49.2	50	500	40	2
52	1.9	0.016	0.41	887	2.43	50	40	49.6	50	1000	40	1.9
53	1.9	0.015	0.4	904	2.48	50	40	49.6	50	1000	40	1.9
54	1.9	0.015	0.4	921	2.52	50	40	49.6	50	1000	40	1.9
55	1.8	0.014	0.39	938	2.57	50	40	49.6	50	1000	40	1.8
56	1.8	0.014	0.38	955	2.62	50	40	49.6	50	1000	40	1.8
57	1.8	0.014	0.38	972	2.66	50	40	49.6	50	1000	40	1.8
58	1.7	0.013	0.37	989	2.71	50	40	49.6	50	1000	40	1.7
59	1.7	0.013	0.36	1006	2.76	50	40	49.6	50	1000	40	1.7
60	1.7	0.013	0.36	1023	2.8	50	40	49.6	50	1000	40	1.7
61	1.6	0.012	0.35	1040	2.85	50	40	49.6	50	1000	40	1.6
62	1.6	0.012	0.35	1057	2.9	50	40	49.6	50	1000	40	1.6
63	1.6	0.012	0.34	1075	2.94	50	40	49.6	50	1000	40	1.6
64	1.6	0.011	0.33	1092	2.99	50	40	49.6	50	1000	40	1.6
65	1.5	0.011	0.33	1109	3.04	50	40	49.6	50	1000	40	1.5
66	1.5	0.011	0.32	1126	3.08	50	40	49.6	50	1000	40	1.5
67	1.5	0.011	0.32	1143	3.13	50	40	49.6	50	1000	40	1.5
68	1.5	0.01	0.31	1160	3.18	50	40	49.6	50	1000	40	1.5
69	1.4	0.01	0.31	1177	3.22	50	40	49.6	50	1000	40	1.4
70	1.4	0.01	0.31	1194	3.27	50	40	49.6	50	1000	40	1.4
71	1.4	0.01	0.3	1211	3.32	50	40	49.6	50	1000	40	1.4
72	1.4	0.01	0.3	1228	3.36	50	40	49.6	50	1000	40	1.4
