# Supplementary material for: Interplay between strain fitness and transmission frequency determines prevalence of antimicrobial resistance
Source: Frontiers journal article supplement (doi:10.3389/fevo.2023.981377), 2023-03-15
Supplement: Table_2.XLSX [file Table_2.XLSX]

## Sheet: Sheet1
Main Figure	Suppl. Figure	Run name	No. days	No. repeats	No. hosts	Initial conditions, S_0 R_0	Dilution factor, D	Mixing factor, M	Treatment intervals, I_antim	Transmission intervals, I_trans	Relative fitness, w	Decrease in growth rate, d_smax
4A	2A	V59	50	300	1	100% hosts: S_0 = 5x10^5 , R_0=5x10^5	0.001	0.1	0-9	0	0.4-1.0	40
4C	5C, 3A	V61	50	3	100	100% hosts: S_0 = 5x10^5 , R_0=5x10^5	0.001	0.1	0-9	1	0.4-1.0	40
4B	--	V119	50	300	1	100% hosts: S_0 = 5x10^5 , R_0=5x10^5	0.001	0.1	0-9	0	0.4-1.0	10.0-90.0
4D	5D	V101	50	3	100	100% hosts: S_0 = 5x10^5 , R_0=5x10^5	0.001	0.1	0-9	1	0.4-1.0	10.0-91.0
5A	--	V77	100	3	100	100% hosts: S_0 = 5x10^5 , R_0=5x10^5	0.001	0.1	0-19	0-19	0.7	40
5B	--	V109.6	100	3	100	100% hosts: S_0 = 5x10^5 , R_0=5x10^5	0.001	0.1	0-9	0-9	0.6	10.0-91.0
5C	--	V109	100	3	100	100% hosts: S_0 = 5x10^5 , R_0=5x10^5	0.001	0.1	0-9	0-9	0.8	10.0-91.0
6	--	V99	200	3	100	100% hosts: S_0 = 5x10^5 , R_0=5x10^5	0.001	0.1	0-56	0-39	0.9	40
7A	--	V116	50	3	100	p1 - 100% hosts: S_0 = 5x10^5 , R_0=5x10^5 / p2 - 100% hosts: S_0 = 5x10^6	0.001	0.1	p1: 6 / p2: 8-14	intra: 1 / inter: 0-9	0.9	40
7B	--	V86	50	3	100	p1,p2 - 100% hosts: S_0 = 5x10^5 , R_0=5x10^5	0.001	0.1	p1: 6 / p2: 8-14	intra: 1 / inter: 0-9	0.9	40
--	5A, 2C, 7A	V57	50	3	100	100% hosts: S_0 = 5x10^5 , R_0=5x10^5	0.001	0.1	0-9	0	0.4-1.0	40
--	5B,7B	V100	50	3	100	100% hosts: S_0 = 5x10^5 , R_0=5x10^5	0.001	0.1	0-9	0	0.4-1.0	10.0-91.0
--	2B	V93	50	1000	1	100% hosts: S_0 = 5x10^5 , R_0=5x10^5	0.001	0.1	0-9	0	0.4-1.0	40
--	2D	V91	50	1	1000	100% hosts: S_0 = 5x10^5 , R_0=5x10^5	0.001	0.1	0-9	0	0.4-1.0	40
--	3B, 6C	V65	50	3	100	10% hosts: S_0 = 5x10^5 , R_0=5x10^5, 90% hosts: S_0 = 5x10^6	0.001	0.1	0-9	1	0.4-1.0	40
--	4A	V110	100	3	100	100% hosts: S_0 = 5x10^5 , R_0=5x10^5	0.001	0.05	0-19	0-19	0.8	40
--	4B	V73	100	3	100	100% hosts: S_0 = 5x10^5 , R_0=5x10^5	0.001	0.1	0-19	0-19	0.8	40
--	4C	V111	100	3	100	100% hosts: S_0 = 5x10^5 , R_0=5x10^5	0.001	0.2	0-19	0-19	0.8	40
--	6A	V63	50	3	100	10% hosts: S_0 = 5x10^5 , R_0=5x10^5, 90% hosts: S_0 = 5x10^6	0.001	0.1	0-9	0	0.4-1.0	40
--	6B	V64	50	3	100	10% hosts: S_0 = 5x10^5 , R_0=5x10^5, 90% hosts: S_0 = 5x10^6	0.001	0.1	0-9	0	0.4-1.0	10.0-80.0
--	6D	V66	50	3	100	10% hosts: S_0 = 5x10^5 , R_0=5x10^5, 90% hosts: S_0 = 5x10^6	0.001	0.1	0-9	1	0.4-1.0	10.0-80.0
--	8A	V78	100	3	100	100% hosts: S_0 = 5x10^5 , R_0=5x10^5	0.001	0.1	0-19	0-19	0.4	40
--	8B	V75	100	3	100	100% hosts: S_0 = 5x10^5 , R_0=5x10^5	0.001	0.1	0-19	0-19	0.5	40
--	8C	V76	100	3	100	100% hosts: S_0 = 5x10^5 , R_0=5x10^5	0.001	0.1	0-19	0-19	0.6	40
--	8D	V80	100	3	100	100% hosts: S_0 = 5x10^5 , R_0=5x10^5	0.001	0.1	0-19	0-19	0.92	40
--	8E	V81	100	3	100	100% hosts: S_0 = 5x10^5 , R_0=5x10^5	0.001	0.1	0-19	0-19	0.94	40
--	8F	V82	100	3	100	100% hosts: S_0 = 5x10^5 , R_0=5x10^5	0.001	0.1	0-19	0-19	0.96	40
--	9A	V109.4	100	3	100	100% hosts: S_0 = 5x10^5 , R_0=5x10^5	0.001	0.1	0-9	0-9	0.4	10.0-91.0
--	9B	V109.5	100	3	100	100% hosts: S_0 = 5x10^5 , R_0=5x10^5	0.001	0.1	0-9	0-9	0.5	10.0-91.0
--	9C	V113	100	3	100	100% hosts: S_0 = 5x10^5 , R_0=5x10^5	0.001	0.1	0-9	0-9	0.7	10.0-91.0
--	9D	V109.	100	3	100	100% hosts: S_0 = 5x10^5 , R_0=5x10^5	0.001	0.1	0-9	0-9	0.9	10.0-91.0
